# Supplementary material
Source: Springer Nature journal article supplement (https://www.springermedizin.de/resource/supplementary/13075_2011_3467_MOESM2_ESM.pdf/9694566)

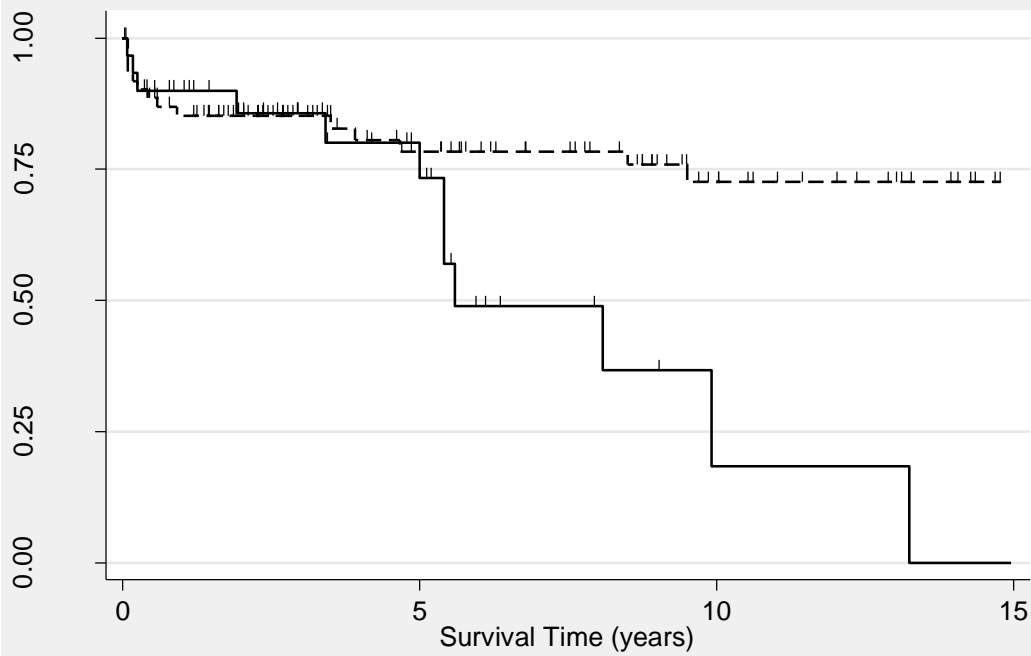

— male    - - - - female

Supplement: MOESM2 [file 9694566]
